# Supplementary material for: Predation Pressure of Invasive Marsh Frogs: A Threat to Native Amphibians?
Source: MDPI journal article supplement (doi:10.3390/d13110595), 2021-11-19
Supplement: s1 [file s1]

# Supplementary materials

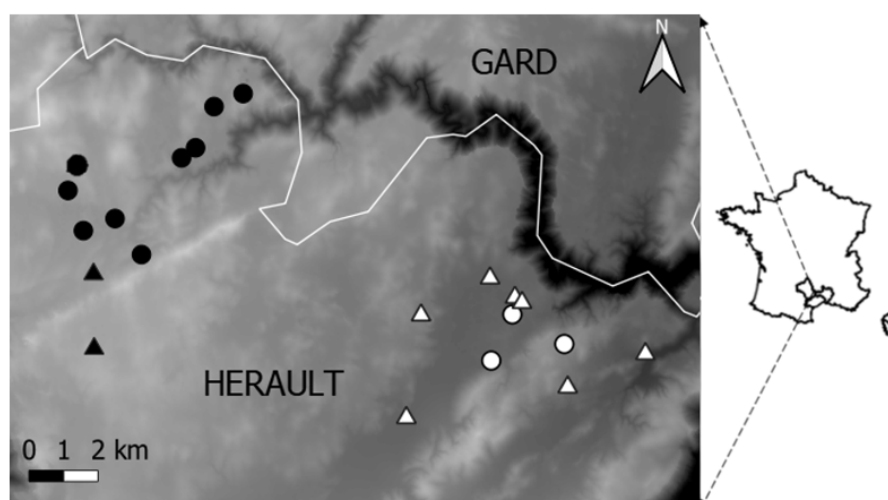

**Figure S1.** Sampling area of invasive marsh frogs in Larzac. Background indicates relief with lowest elevation in dark. The insert shows France and three departments (Hérault, Gard, Aveyron). Detailed coordinates are not given for conservation purposes

**Table S1.** Sample size of studied *Pelophylax* marsh frogs per pond and per month

| Pond  | Sample size |     |      |      |
|-------|-------------|-----|------|------|
|       | April       | May | June | July |
| A     | 15          | 6   | 10   | 19   |
| B     | 13          | 11  | 0    | 5    |
| C     | 8           | 8   | 8    | 8    |
| D     | 9           | 4   | 7    | 20   |
| E     | 26          | 18  | 20   | 7    |
| F     | 1           | 5   | 10   | 7    |
| G     | 2           | 7   | 9    | 5    |
| H     | 7           | 10  | 15   | 20   |
| I     | 27          | 16  | 24   | 30   |
| J     | 45          | 18  | 25   | 30   |
| K     | 17          | 12  | 22   | 20   |
| L     | 9           | 11  | 10   | 6    |
| M     | 10          | 29  | 21   | 18   |
| N     | 2           | 3   | 1    | 1    |
| O     | 2           | 9   | 5    | 0    |
| P     | 28          | 23  | 30   | 30   |
| Q     | 34          | 19  | 20   | 26   |
| R     | 8           | 6   | 5    | 8    |
| S     | 0           | 7   | 8    | 8    |
| T     | 7           | 12  | 13   | 21   |
| U     | 1           | 1   | 3    | 1    |
| Total | 271         | 235 | 266  | 290  |

**Table S2.** Total number (N), number of occurrence (O) and frequency of occurrence (FO) of amphibian prey types in stomach of marsh frogs. ND: not determined

| Order        | Stage                         | Species                      | N     | O                             | FO (%) |
|--------------|-------------------------------|------------------------------|-------|-------------------------------|--------|
| Anura        | Adult                         | <i>Hyla meridionalis</i>     | 10    | 10                            | 0.94   |
|              |                               | ND                           | 1     | 1                             | 0.09   |
|              | Juvenile                      | <i>Hyla meridionalis</i>     | 1     | 1                             | 0.09   |
|              |                               | <i>Pelodytes punctatus</i>   | 3     | 2                             | 0.19   |
|              |                               | <i>Pelophylax ridibundus</i> | 1     | 1                             | 0.09   |
|              | Tadpole                       | Bufonidae                    | 14    | 6                             | 0.56   |
|              |                               | <i>Bufo spinosus</i>         | 100   | 28                            | 2.64   |
|              |                               | <i>Epidalea calamita</i>     | 1     | 1                             | 0.09   |
|              |                               | <i>Pelophylax ridibundus</i> | 5     | 5                             | 0.47   |
|              |                               | <i>Pelobates cultripes</i>   | 2     | 1                             | 0.09   |
|              |                               | <i>Alytes obstetricans</i>   | 1     | 1                             | 0.09   |
|              |                               | ND                           | 16    | 10                            | 0.94   |
|              |                               | Caudata                      | Adult | <i>Lissotriton helveticus</i> | 17     |
| Larvae       | <i>Triturus marmoratus</i>    | 1                            | 1     | 0.09                          |        |
|              | <i>Lissotriton helveticus</i> | 7                            | 7     | 0.66                          |        |
|              | ND                            | 7                            | 4     | 0.38                          |        |
| ND           | ND                            | 2                            | 1     | 0.09                          |        |
| ND amphibian | ND                            | ND                           | 14    | 14                            | 1.32   |

**Table S3.** Results of model averaging of the GLMM models showing factors influencing amphibian occurrence in stomach contents of marsh frogs. MA: metamorphosed anuran

| Response variable  | Parameters | Estimate | SE     | 95% CI |        |
|--------------------|------------|----------|--------|--------|--------|
| MA occurrence      | Time       | -0.3478  | 0.3417 | -1.018 | 0.323  |
|                    | ln(SVL)    | 8.3868   | 2.3351 | 3.8026 | 12.971 |
| Tadpole occurrence | Time       | -0.6885  | 0.1616 | -1.006 | -0.371 |
|                    | ln(SVL)    | -0.1288  | 0.5307 | -1.170 | 0.9124 |
| Newt occurrence    | Time       | -0.0205  | 2.3524 | -0.104 | 0.0632 |
|                    | ln(SVL)    | 1.5814   | 0.0427 | -3.029 | 6.1922 |

**Table S4.** Estimated numbers of adult Mediterranean tree frogs (*Hyla meridionalis*) and adult palmate newts (*Lissotriton helveticus*) preyed during the whole study period based on intact fresh prey items consumed by invasive marsh frogs (MF) and their abundance at ponds

| Native species                                   | Month | Sample size | MF abundance | Conservative scenario |                      |          | Non-conservative scenario |                      |          |
|--------------------------------------------------|-------|-------------|--------------|-----------------------|----------------------|----------|---------------------------|----------------------|----------|
|                                                  |       |             |              | Stomach contents      | Predation estimation |          | Stomach contents          | Predation estimation |          |
|                                                  |       |             |              |                       | Global               | Per pond |                           | Global               | Per pond |
| Mediterranean tree frog<br>( <i>n</i> =15 ponds) | April | 183         | 195          | 3                     | 95.9                 | 6.4      | 6,0                       | 191.8                | 12.8     |
|                                                  | May   | 166         | 289          | 0                     | 0.0                  | 0.0      | 3.0                       | 161.9                | 10.8     |
|                                                  | June  | 192         | 373          | 0                     | 0.0                  | 0.0      | 1,0                       | 58.3                 | 3.9      |
|                                                  | July  | 211         | 364          | 0                     | 0.0                  | 0.0      | 0.0                       | 0.0                  | 0.0      |
|                                                  | Total | 752         |              | 3                     | 95.9                 | 6.4      | 10.0                      | 411.9                | 27.5     |
| Palmate newt<br>( <i>n</i> =21 ponds)            | April | 271         | 289          | 10                    | 319.9                | 15.2     | 10.0                      | 319.9                | 15.2     |
|                                                  | May   | 235         | 445          | 2                     | 117.4                | 5.6      | 2.0                       | 117.4                | 5.6      |
|                                                  | June  | 266         | 521          | 1                     | 58.8                 | 2.8      | 6.0                       | 352.6                | 16.8     |
|                                                  | July  | 290         | 535          | 0                     | 0.0                  | 0.0      | 0.0                       | 0.0                  | 0.0      |
|                                                  | Total | 1062        |              | 13                    | 496.1                | 23.6     | 18.0                      | 789.9                | 37.6     |

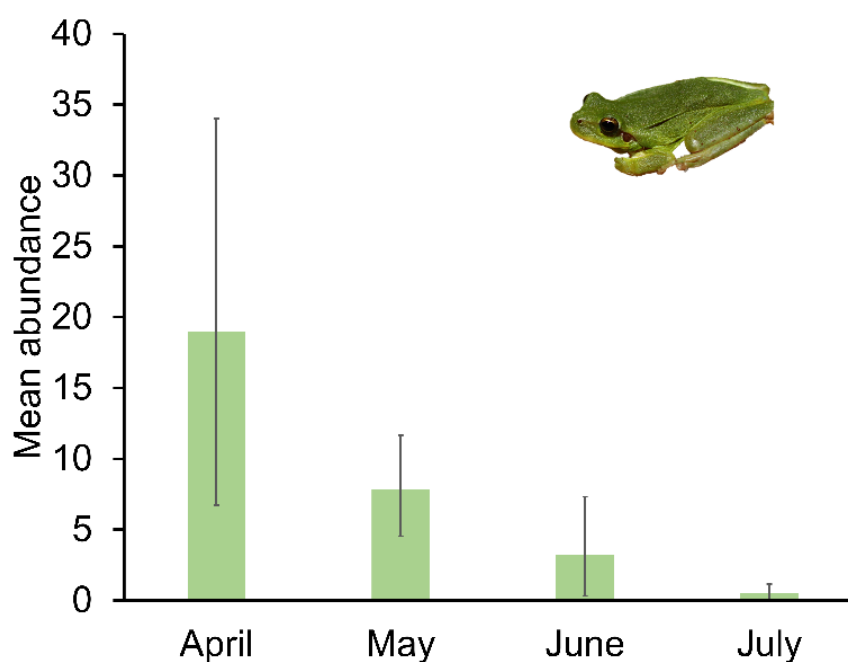

**Figure S2.** Mean observed abundance of native Mediterranean tree frogs in the 15 ponds where they were observed (visual counting). Whiskers: 95% CI
